# Supplementary material for: In Vitro Anti-Inflammatory Study of Limonoids Isolated from Chisocheton Plants
Source: MDPI journal article supplement (doi:10.3390/cimb46010058), 2024-01-20
Supplement: s1 [file s1]

# ***In vitro* Anti-inflammatory Study of Limonoids Isolated from *Chisocheton* Plants**

**Erina Hilmayanti<sup>1,3</sup>, Xuhao Huang<sup>1</sup>, Supriatno Salam<sup>5</sup>, Nurlelasari<sup>3</sup>, Unang Supratman<sup>3,4</sup>, Kazuya Kabayama<sup>1,2\*</sup>, and Koichi Fukase<sup>1,2,\*</sup>**

<sup>1</sup> Department of Chemistry, Graduate School of Science, Osaka University, Toyonaka 560-0043, Japan

<sup>2</sup> Project Research Center for Fundamental Sciences, Osaka University, Toyonaka 560-0043, Japan

<sup>3</sup> Department of Chemistry, Faculty of Mathematics and Natural Sciences, Universitas Padjadjaran, Jatinangor 45363, Indonesia

<sup>4</sup> Central Laboratory, Universitas Padjadjaran, Jatinangor 45363, Indonesia

<sup>5</sup> Faculty of Pharmacy, Universitas Mulawarman, Samarinda, Kalimantan Timur 75123, Indonesia

\* Correspondence: koichi@chem.sci.osaka-u.ac.jp; Tel.: +81-6-6850-5388 (K.F.); kaba@chem.sci.osaka-u.ac.jp; Tel.: +81-6-6850-5192 (K.K.)

## Contents

**Figure S1.** Agonist effects of 17 Limonoid compounds (**1-17**) at a concentration of 20  $\mu$ M on the NF- $\kappa$ B activation in HEK-Blue<sup>TM</sup> hTLR4 Cells. All data from four independent experiments are expressed as mean $\pm$ SD. ##p<0.0001 vs. culture medium-only control group; \*p<0.01, \*\*p<0.001, \*\*\*p<0.0001 vs. culture medium-only control group. Analyzed by one-way ANOVA, followed by Dunnett's test using GraphPad Prism 9.

**Figure S2.** Effects of dexamethasone, and compounds **3-5**, **9**, **11-12**, and **15-17** in concentrations of 1, 5, 10, and 20  $\mu$ M on the viability of THP-1 Cells presented as a heatmap.

**Figure S3.** Western blot result of compounds **3**, **4**, **5**, **9**, **12**, **15**, and **16** on MAPK activation (A: phosphorylated p38 MAPK; B: total p38 MAPK) in LPS-stimulated THP-1 cells.

**Table S1.** Cytotoxic effects of 17 tested compounds against RAW264.7 macrophage.

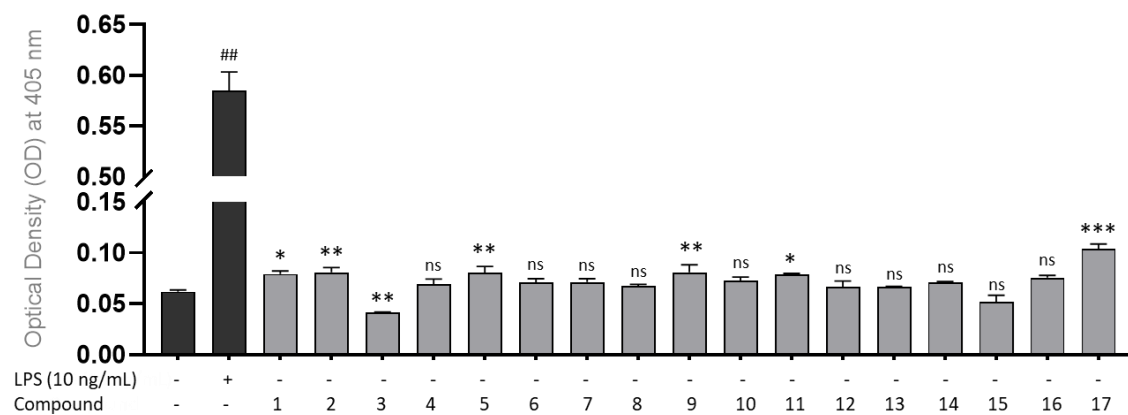

**Figure S1.** Agonist effects of 17 Limonoid compounds (1–17) at a concentration of 20  $\mu$ M on the NF- $\kappa$ B activation in HEK-Blue™ hTLR4 Cells. All data from four independent experiments are expressed as mean $\pm$ SD. ## $p$ <0.0001 vs. culture medium-only control group; \* $p$ <0.01, \*\* $p$ <0.001, \*\*\* $p$ <0.0001 vs. culture medium-only control group. Analyzed by one-way ANOVA, followed by Dunnett's test using GraphPad Prism 9.

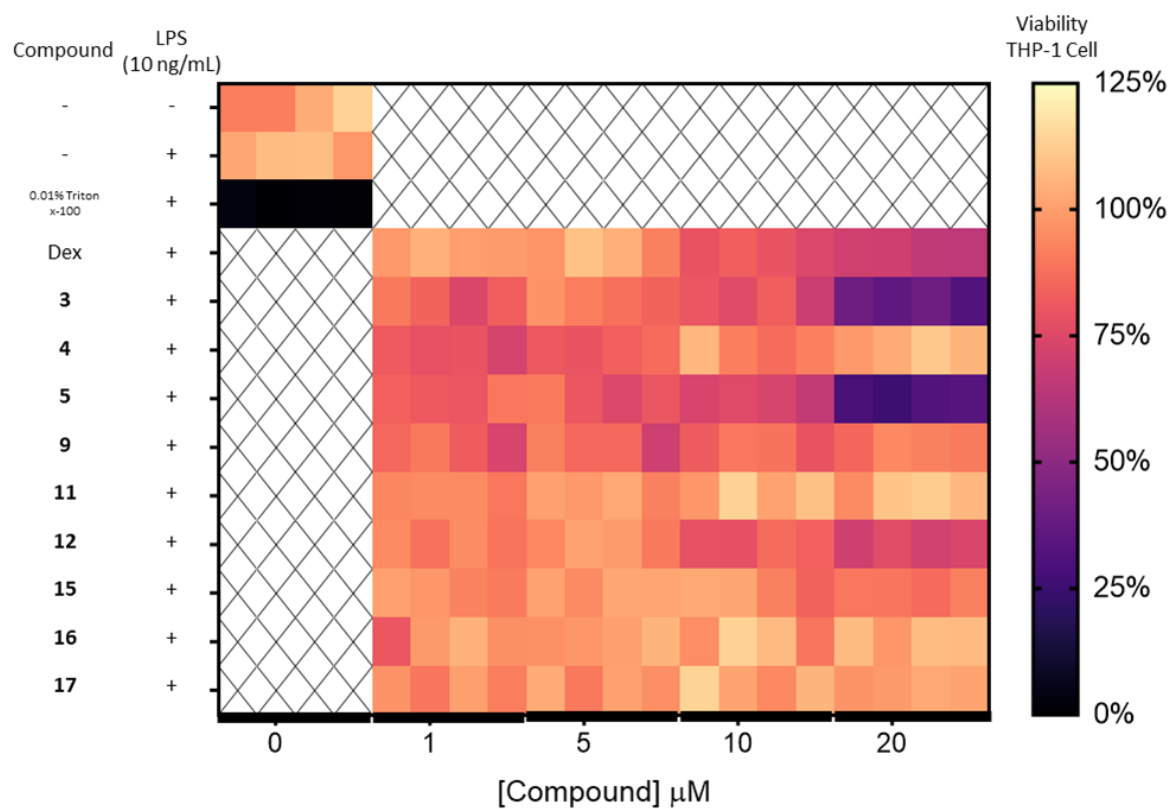

**Figure S2.** Effects of dexamethasone, and compounds 3-5, 9, 11-12, and 15-17 in concentrations of 1, 5, 10, and 20  $\mu\text{M}$  on the viability of THP-1 Cells presented as a heatmap.



**Table S1.** Cytotoxic effects of 17 tested compounds against RAW264.7 macrophage.

| Samples   | Viability cell (%) |                  |                   |
|-----------|--------------------|------------------|-------------------|
|           | RAW 264.7          |                  |                   |
|           | 5 $\mu$ M          | 10 $\mu$ M       | 20 $\mu$ M        |
| Control*  | >99.90             | >99.90           | >99.90            |
| Etoposide | 67.53 $\pm$ 2.36   | 54.79 $\pm$ 2.58 | 38.85 $\pm$ 3.19  |
| <b>1</b>  | >99.90             | >99.90           | >99.90            |
| <b>2</b>  | 96.25 $\pm$ 3.67   | >99.90           | >99.90            |
| <b>3</b>  | 90.27 $\pm$ 5.24   | 91.44 $\pm$ 8.26 | 70.21 $\pm$ 2.29  |
| <b>4</b>  | 85.04 $\pm$ 5.66   | 85.92 $\pm$ 5.34 | 82.41 $\pm$ 1.15  |
| <b>5</b>  | 83.58 $\pm$ 8.91   | 84.29 $\pm$ 0.28 | 3.19 $\pm$ 1.24   |
| <b>6</b>  | 103.06 $\pm$ 6.05  | >99.90           | 96.66 $\pm$ 2.14  |
| <b>7</b>  | >99.90             | >99.90           | 95.88 $\pm$ 2.19  |
| <b>8</b>  | 89.47 $\pm$ 9.38   | 94.75 $\pm$ 0.32 | 87.46 $\pm$ 3.33  |
| <b>9</b>  | 93.76 $\pm$ 1.86   | 89.94 $\pm$ 2.44 | 79.41 $\pm$ 10.16 |
| <b>10</b> | 93.19 $\pm$ 4.20   | 82.06 $\pm$ 1.31 | 86.14 $\pm$ 4.07  |
| <b>11</b> | 90.10 $\pm$ 7.88   | 79.02 $\pm$ 1.58 | 78.88 $\pm$ 2.21  |
| <b>12</b> | >99.90             | >99.90           | 89.39 $\pm$ 6.90  |
| <b>13</b> | >99.90             | >99.90           | 91.89 $\pm$ 4.37  |
| <b>14</b> | >99.90             | 88.19 $\pm$ 3.86 | 91.33 $\pm$ 4.19  |
| <b>15</b> | 92.82 $\pm$ 1.79   | 91.90 $\pm$ 3.59 | 90.91 $\pm$ 4.95  |
| <b>16</b> | 91.79 $\pm$ 3.18   | 81.32 $\pm$ 7.05 | 89.42 $\pm$ 7.08  |
| <b>17</b> | 77.49 $\pm$ 10.22  | 72.24 $\pm$ 4.68 | 73.09 $\pm$ 2.02  |

\*Control: 1% EtOH in medium
